# Supplementary material for: Ultrasensitive sandwich-type electrochemical immunosensor based on trimetallic nanocomposite signal amplification strategy for the ultrasensitive detection of CEA
Source: PubMed Central journal article supplement (PMC4973229; doi:10.1038/srep30849), 2016-08-04
Supplement: srep30849-s1.pdf [file srep30849-s1.pdf]

## **Supplementary Information**

Ultrasensitive sandwich-type electrochemical immunosensor based on  
trimetallic nanocomposite signal amplification strategy for the  
ultrasensitive detection of CEA

Lihui Tian, Li Liu, Yueyuan Li, Qin Wei, Wei Cao\*

Key Laboratory of Chemical Sensing & Analysis in Universities of Shandong, School  
of Chemistry and Chemical Engineering, University of Jinan, Jinan 250022, PR China

Lihui Tian (E-mail: [jndx\\_Tianlihui@163.com](mailto:jndx_Tianlihui@163.com))

Li Liu (E-mail: [liul\\_jndx@163.com](mailto:liul_jndx@163.com))

Yueyuan Li (E-mail: [yueyuanli86@163.com](mailto:yueyuanli86@163.com))

Qin Wei (E-mail: [sdjndxwq@163.com](mailto:sdjndxwq@163.com))

Wei Cao (E-mail: [jn\\_chm302@163.com](mailto:jn_chm302@163.com))

\*Corresponding author. Tel.: +86-531-82767890. Fax: +86-531-82765475.

E-mail address: [jn\\_chm302@163.com](mailto:jn_chm302@163.com) ([jncw88@163.com](mailto:jncw88@163.com))

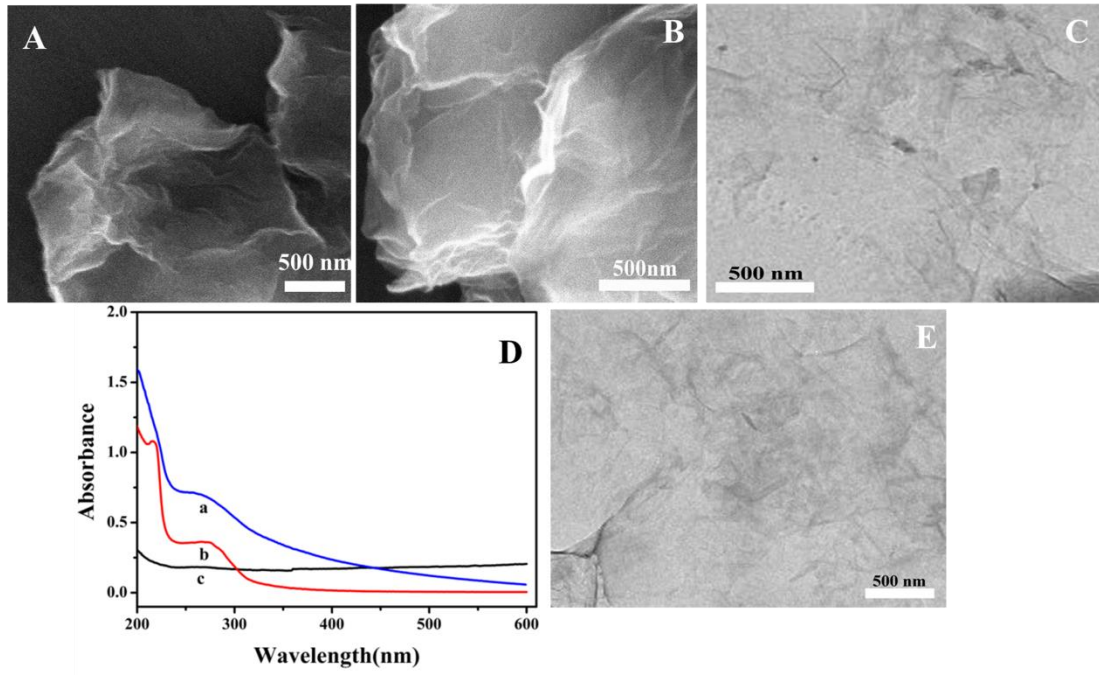

Figure S1 SEM images of NGs (A) and CD-NGs (B); The TEM of NGs (C) and CD-NGs (E); (D) The UV-vis spectra of CD-NGs (a),  $\beta$ -CD (b) and NGs (c);

**Table S1** Comparison of the performance of the proposed electrochemical CEA immunosensor for other reports

| Nanomaterials                                      | Marker | Linear range<br>(ng/mL) | Limit of Detection<br>(pg/mL) | Reference |
|----------------------------------------------------|--------|-------------------------|-------------------------------|-----------|
| PdPt nanocages/MWCNT-Ab <sub>2</sub>               | CEA    | 0.001-20                | 0.2                           | 1         |
| Ab <sub>2</sub> -Au-TB-rGO                         | CEA    | 0.01-100                | 3                             | 2         |
| Ag-Ab <sub>2</sub>                                 | CEA    | 0.001-50                | 0.27                          | 3         |
| Fe <sub>3</sub> O <sub>4</sub> /Au-Ab <sub>2</sub> | CEA    | 0.001-30                | 0.39                          | 4         |
| HRP-Ab <sub>2</sub> -PtNPs                         | CEA    | 0.02-120                | 12                            | 5         |
| Ab <sub>2</sub> -NiAuPt-NGs                        | CEA    | 0.001-100               | 0.27                          | This work |

**Table S2.** Comparison of different methods for the detection of CEA

| Methods                                  | Linear range       | Limit of detection | References  |
|------------------------------------------|--------------------|--------------------|-------------|
| FL quenching method                      | 0.257~12.9 ng/mL   | 5 pg/mL            | 6           |
| Paper-based microfluidic electrochemical | 0.01~100 ng/mL     | 0.01 ng/mL         | 7           |
| Electrochemical immunosensor             | 0.001~20 ng/mL     | 0.2 pg/mL          | 1           |
| ECL immunosensor                         | 20 fg/mL~1.0 ng/mL | 6.7 fg/mL          | 8           |
| Electrochemical immunosensor             | 0.001~100ng/mL     | 0.27 pg/mL         | This method |

## References

1. Li, N. *et al.* An ultrasensitive electrochemical immunosensor for CEA using MWCNT-NH<sub>2</sub> supported PdPt nanocages as labels for signal amplification. *J. Mater. Chem. B.* **3**, 2006-2011 (2015).
2. Liu, N., Liu, Z., Han, H. & Ma, Z. Graphene oxide reduced directly by redox probes for multiplexed detection of tumor markers. *J. Mater. Chem. B.* **2**, 3292-3298 (2014).
3. Wang, X. *et al.* An ultrasensitive electrochemical immunosensor based on the catalytical activity of MoS<sub>2</sub>-Au composite using Ag nanospheres as labels. *Sensor. Actuat. B-Chem.* **206**, 30-36 (2015).
4. Dong, P., Liang, R., Huang, H. & Qiu, J. Electrochemical immunosensor for carcinoembryonic antigen based on signal amplification strategy of graphene and Fe<sub>3</sub>O<sub>4</sub>/Au NPs. *J. Electroanal. Chem.* **761**, 112–117 (2016).
5. Yang, H. *et al.* Electrochemical immunosensor for detecting carcinoembryonic antigen using hollow Pt nanospheres-labeled multiple enzyme-linked antibodies as labels for signal amplification. *Biochem. Eng. J.* **56**, 116–124 (2011).
6. Zhou, Z. M. *et al.* Carcino-embryonic antigen detection based on fluorescence resonance energy transfer between quantum dots and graphene oxide. *Biosens. Bioelectron.* **59**, 397-403 (2014).
7. Wu, Y., Xue, P., Hui, K. M. & Kang, Y. A paper-based microfluidic electrochemical immunodevice integrated with amplification-by-polymerization for the ultrasensitive multiplexed detection of cancer biomarkers. *Biosens. Bioelectron.* **52**, 180-187 (2014).
8. Zhuo, Y. *et al.* Sandwich-format electrochemiluminescence assays for tumor marker based on PAMAM dendrimer-L-cysteine-hollow gold nanosphere nanocomposites. *Biosens. Bioelectron.* **53**, 459-464 (2014).
